# Supplementary material for: Uranyl bis-iminophosphorane complexes with in- and out-of-plane equatorial coordinationElectronic supplementary information (ESI) available: Variable temperature 1H NMR spectra; Raman spectra; solid state diffuse reflectance electronic absorption spectra; luminescence spectra; interatomic distances of the optimised structures of 1* and 2* from molecular modelling calculations. See http://www.rsc.org/suppdata/dt/b3/b304602h/
Source: Royal Society of Chemistry journal article supplement (doi:10.1039/b304602h), 2003-01-01
Supplement: b304602h.doc [file b304602h.doc]

# Electronic Supporting Information

**a**

**b**

Variable temperature 1H NMR spectra of **5** in the regions of a) phenyl and b) one of the SiMe3 groups in CD2Cl2

**SOLUTION RAMAN SPECTRA**

The Raman spectra of (a) difference spectra of a thf solution of **1** and thf; (b) **1** in the solid state.

The Raman spectra of (a) difference spectra of a thf solution of **2** and thf; (b) **2** in the solid state. (* represents error in the subtraction of the solvent spectrum)

The Raman spectra of (a) difference spectra of a dichloromethane solution of **5** and dichloromethane; (b) **5** in the solid state. (* represents error in the subtraction of the solvent spectrum)

**SOLID STATE UV/VIS SPECTROSCOPY**

Solid state diffuse reflectance electronic absorption spectrum of **1**

Solid state diffuse reflectance electronic absorption spectrum of **2**

Solid state diffuse reflectance electronic absorption spectrum of **5**

**SOLUTION EMISSION SPECTROSCOPY**

**Figure 7.** Luminescence spectra of **1** (1.49 mM, in thf) excitation nm = (a) 430, (b) 440, (c) 500 showing no luminescence from **1**, only Raman peaks of the solvent; and **2** (1.78 mM, in thf) excitation nm = (d) 450.

Interatomic distances and angles of the optimised structures of **1*** and **2*** from molecular modelling calculations

|  | **1*** | **2*** |
| --- | --- | --- |
| U-O | 1.78 | 1.78 |
| U-O | 1.78 | 1.78 |
| U-O | 2.56 | 2.48 |
| U-C/N | 2.75 | 2.57 |
| U-N | 2.64 | 2.61 |
| U-N | 2.54 | 2.63 |
| U-Cl | 2.70 | 2.80 |
| N-P | 1.62 | 1.60 |
| N-P | 1.601 | 1.61 |
| O-U-O | 174.7 | 174.5 |
| P-C-P | 135.4 |  |
| P-N-P |  | 158.7 |
| P-N-U | 95.9 | 97.9 |
